# Supplementary material for: Effect of Streptococcus anginosus on biological response of tongue squamous cell carcinoma cells
Source: Research Square preprint supplement (doi:10.21203/rs.3.rs-19115/v4), 2021-01-20
Supplement: Supplementary file 1 [file 04a9eebc135acdc39a29e345.docx]

**SCC15**

**SCC15/T**

**SCC15/3-MA**

**SCC15/S+3-MA**

**SCC15 /S**

1. Beclin1

**SCC15/S+3-MA**

**SCC15/3-MA**

**SCC15/T**

**SCC15**

**SCC15 /S**


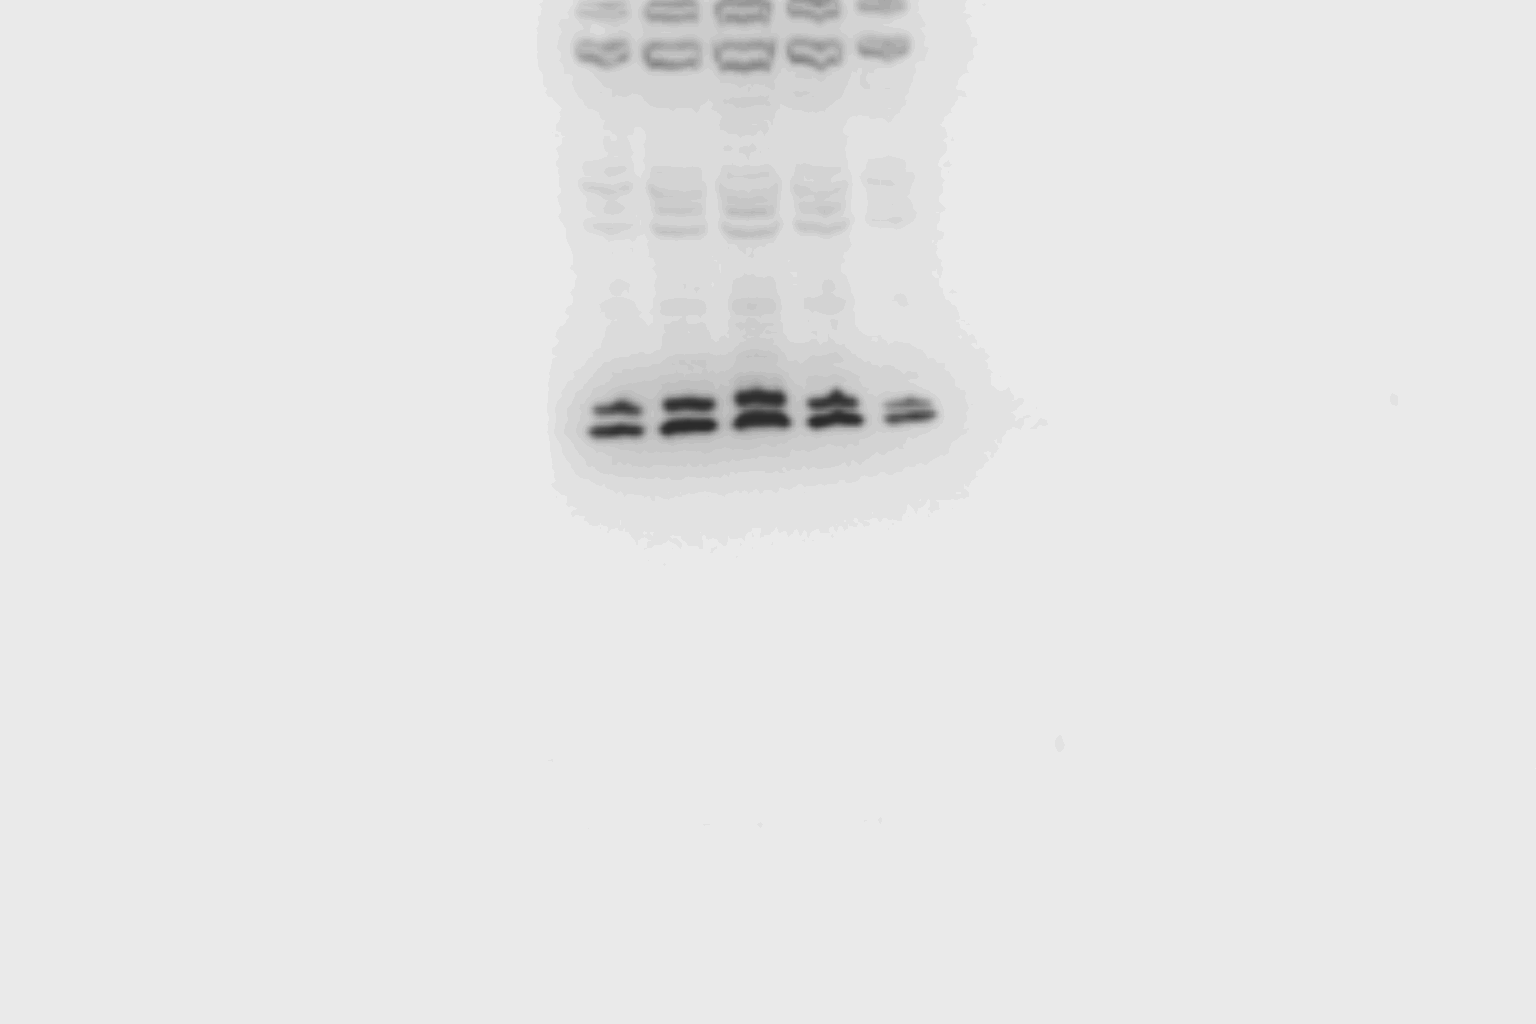


1. LC3I&LC3II

**SCC15/3-MA**

**SCC15/S+3-MA**

**SCC15 /S**

**SCC15/T**

**SCC15**





1. GAPDH
